2023 | VOLUME 76 | NUMBER 3

# The American Journal of Psychotherapy

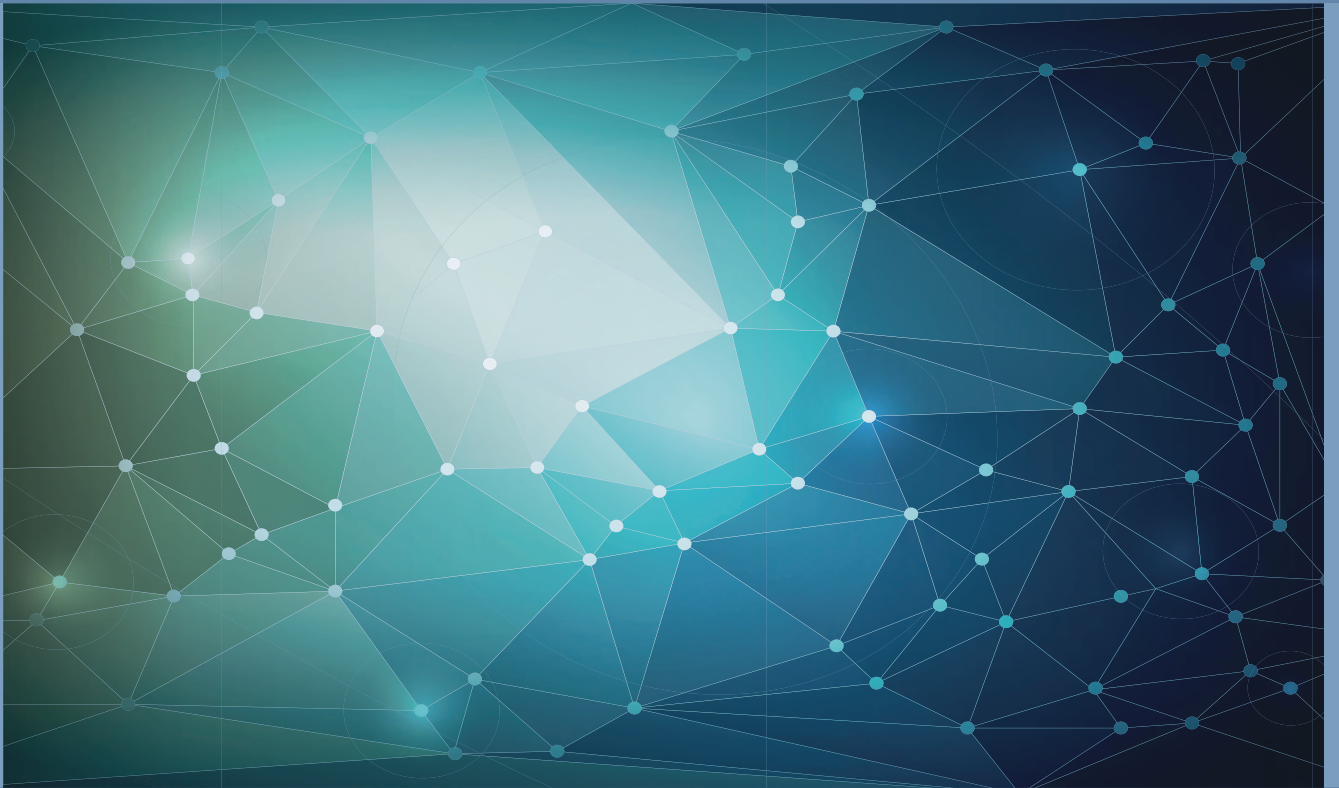

AMERICAN  
PSYCHIATRIC  
ASSOCIATION 

[psychotherapy.psychiatryonline.org](https://www.psychotherapy.psychiatryonline.org)
